# Supplementary material for: Understanding the DNA binding of novel non-symmetrical guanidinium/2-aminoimidazolinium derivatives
Source: Royal Society of Chemistry journal article supplement (doi:10.1039/c0ob00428f), 2010-01-01
Supplement: c0ob00428f.pdf [file c0ob00428f.pdf]

## Supplementary material

### Understanding the DNA binding of novel non-symmetrical guanidinium/2-aminoimidazolinium derivatives

*Padraic S. Nagle,<sup>1</sup> Susan J. Quinn,<sup>1#</sup> John M. Kelly,<sup>1</sup> Daniel H. O'Donovan,<sup>1</sup> Amir R. Kahn,<sup>2</sup>  
Fernando Rodriguez,<sup>1#</sup> Binh Nguyen,<sup>3</sup> W. David Wilson,<sup>3</sup> and Isabel Rozas<sup>1\*</sup>*

**Circular Dichroism results for compounds 1, 2, 6 and 8**

**II**

**Comparative docking**

**III**

## Circular Dichroism results for compounds **1**, **2**, **6** and **8**

CD titrations were performed not only for all asymmetric derivatives by increasing the compound to DNA Bp/D ratio from 22.4 to 0.56. The maximum absorption occurred at around 280 nm for compounds **8** and **6**, and 260 nm for compounds **2** and **1**. Upon increasing addition of compounds **8**, **6**, **2** and **1** to DNA a growth in the bands at 280 nm and at 260 nm, respectively, is observed corresponding to  $\lambda_{\max}$ . we have observed that, in the cases studied, the strength of binding to the AT oligonucleotide, as calculated in the thermal denaturation experiments with poly(dA•dT)<sub>2</sub>,<sup>14</sup> is related to the amount of incremental growth in the induced CD signal and thus, compound **1** which is the one that most weakly binds to DNA according to the  $\Delta T_m$  values, shows the smallest increment.

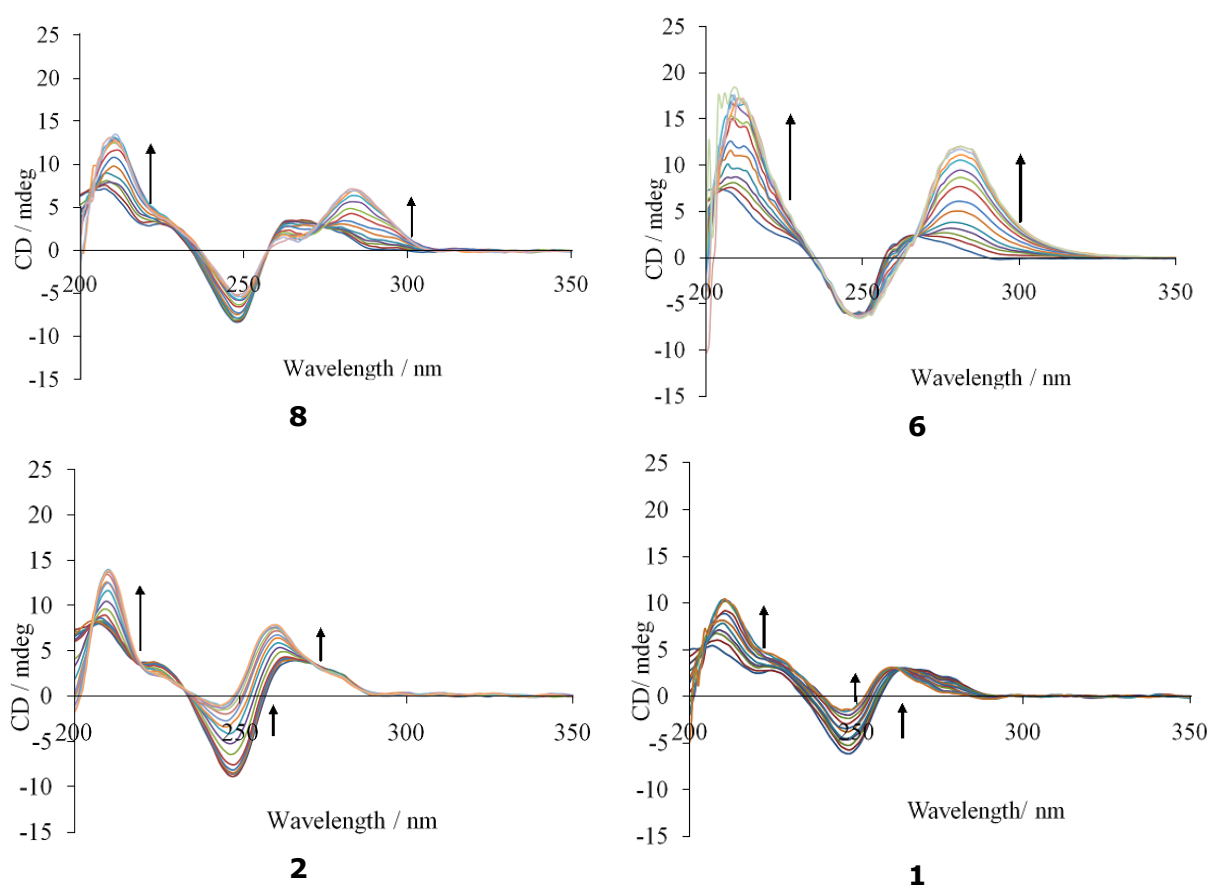

**Figure I.**– CD spectra obtained for compounds **8** (upper left, urea), **6** (upper right, piperazine), **2** (bottom left, CH<sub>2</sub>CH<sub>2</sub>) **1** and (bottom right, CH<sub>2</sub>) titrated with poly(dA•dT)<sub>2</sub> in a concentration of 37.5  $\mu$ M varying the Bp/D ratio from 1.12 to 44.8 through ten additions.

## Comparative Docking

Different docking experiments were carried out for comparative purposes with ArgusLab,<sup>i</sup> AutoDock-4.2<sup>ii</sup> and AutodockVina.<sup>iii</sup> All compounds were docked using a rigid DNA template and in a rigid and flexible approach for the ligand. Considering that these compounds are asymmetrical, both approaches (*normal* and *inverted*) were considered and the final energies used are an average of both types of interactions. The binding scores obtained for AutoDock-4.2 and AutodockVina using rigid and flexible ligands are presented in Table I.

**Table I.-** Binding scores obtained using AutoDock-4.2 and AutodockVina in rigid and flexible ligand approaches.

| <b>AVERAGE DOCKING</b>                  |          |                 |                 |                  |                  |
|-----------------------------------------|----------|-----------------|-----------------|------------------|------------------|
| <b>(Normal + inverted)/2 [kcal/mol]</b> |          |                 |                 |                  |                  |
| <b>linker</b>                           |          | <b>ad4flexi</b> | <b>ad4rigid</b> | <b>vinaflexi</b> | <b>vinarigid</b> |
| CH2                                     | <b>1</b> | -5.945          | -10.810         | -8.700           | -8.900           |
| CH2CH2                                  | <b>2</b> | -7.190          | -10.295         | -9.100           | -8.550           |
| O                                       | <b>3</b> | -7.355          | -11.060         | -8.400           | -8.500           |
| S                                       | <b>4</b> | -6.170          | -10.965         | -9.100           | -8.800           |
| NH                                      | <b>5</b> | -6.465          | -10.460         | -8.300           | -8.750           |
| Piperazine                              | <b>6</b> | -6.380          | -10.365         | -8.200           | -8.600           |
| CO                                      | <b>7</b> | -6.675          | -11.535         | -9.000           | -9.250           |
| Urea                                    | <b>8</b> | -5.650          | -11.210         | -8.950           | -9.100           |

Different correlations were tested with the energy corresponding to the conformational penalty ( $E_{\text{conf.penalty}}$ ) and the increment in denaturation energy ( $\Delta T_m$ ) but the only significant model obtained was the one presented in the main manuscript.

## References

- i. ArgusLab 4.01: Planaria Software LLC, Seattle, WA, 2004)
- ii. Autodock 4.2: G. M. Morris, R. Huey, W. Lindstrom, M. F. Sanner, R. K. Belew, D. S. Goodsell, A. J. Olson, *J. Comput. Chem.* 2009, **30**, 2785–2791.
- iii. AutodockVina: O. Trott, A. J. Olson, *J. Comput. Chem.*, 2010, **31**, 455-461.
